# Supplementary material for: The Phenotypic and Genetic Spectrum of Glycogen Storage Disease Type VI
Source: MDPI journal article supplement (doi:10.3390/genes12081205), 2021-08-03
Supplement: s1 [file s1]

## Supplemental Table S1: Publications included in the analysis.

|                                                                                                                                                                                                                                                                                           |
|-------------------------------------------------------------------------------------------------------------------------------------------------------------------------------------------------------------------------------------------------------------------------------------------|
| 1. Aeppli TR, Rymen D, Allegri G, Bode PK, Häberle J. Glycogen storage disease type VI: clinical course and molecular background. <i>Eur J Pediatr</i> . 2020;179:405–13.                                                                                                                 |
| 2. Beauchamp NJ, Taybert J, Champion MP, Layet V, Heinz-Erian P, Dalton A, et al. High frequency of missense mutations in glycogen storage disease type VI. <i>J Inherit Metab Dis</i> . 2007;30:722–34.                                                                                  |
| 3. Beyzaei Z, Ezgu F, Geramizadeh B, Imanieh MH, Haghighat M, Dehghani SM, et al. Clinical and genetic spectrum of glycogen storage disease in Iranian population using targeted gene sequencing. <i>Sci Rep</i> . 2021;11:7040.                                                          |
| 4. Burwinkel B, Bakker HD, Herschkovitz E, Moses SW, Shin YS, Kilimann MW. Mutations in the liver glycogen phosphorylase gene (PYGL) underlying glycogenosis type VI. <i>Am J Hum Genet</i> . 1998;62:785–91.                                                                             |
| 5. Çakar NE, Gezdirici A, Topuz HŞ, Önal H. Novel variants in Turkish patients with glycogen storage disease. <i>Pediatr Int</i> . 2020;62:1145–50.                                                                                                                                       |
| 6. Chang S, Rosenberg MJ, Morton H, Francomano CA, Biesecker LG. Identification of a mutation in liver glycogen phosphorylase in glycogen storage disease type VI. <i>Hum Mol Genet</i> . 1998;7:865–70.                                                                                  |
| 7. Davit-Spraul A, Piraud M, Dobbelaere D, Valayannopoulos V, Labrune P, Habes D, et al. Liver glycogen storage diseases due to phosphorylase system deficiencies: diagnosis thanks to non invasive blood enzymatic and molecular studies. <i>Mol Genet Metab</i> . 2011;104:137–43.      |
| 8. Eghbali M, Fatemi KS, Salehpour S, Abiri M, Saei H, Talebi S, et al. Whole-Exome Sequencing Uncovers Novel Causative Variants and Additional Findings in Three Patients Affected by Glycogen Storage Disease Type VI and Fanconi-Bickel Syndrome. <i>Front Genet</i> . 2020;11:601566. |
| 9. Grünert SC, Rosenbaum-Fabian S, Hannibal L, Schumann A, Spiekeroetter U. Successful pregnancy in a woman with glycogen storage disease type 6. <i>Mol Genet Metab Rep</i> . 2021;27:100770.                                                                                            |
| 10. Grünert SC, Hannibal L, Schumann A, Rosenbaum-Fabian S, Beck-Wödl S, Haack TB, et al. Identification and Characterization of a Novel Splice Site Mutation Associated with Glycogen Storage Disease Type VI in Two Unrelated Turkish Families. <i>Diagnostics (Basel)</i> . 2021;11.   |
| 11. Jagadisan B, Ranganath P. Glycogen Storage Disease Type VI With a Novel Mutation in PYGL Gene. <i>Indian Pediatr</i> . 2017;54:775–6.                                                                                                                                                 |
| 12. Korula S, Danda S, Paul PG, Mathai S, Simon A. Hepatic Glycogenoses Among Children-Clinical and Biochemical Characterization: Single-Center Study. <i>J Clin Exp Hepatol</i> . 2020;10:222–7.                                                                                         |
| 13. Liu B, Wu B, Lu Y, Zhang P, Xiao F, Li G, et al. A Novel, Recurrent, 3.6-kb Deletion in the PYGL Gene Contributes to Glycogen Storage Disease Type VI. <i>J Mol Diagn</i> . 2020;22:1373–82.                                                                                          |
| 14. Lu S-Q, Feng J-Y, Liu J, Xie X-B, Lu Y, Abuduxikuer K. Glycogen storage disease type VI can progress to cirrhosis: ten Chinese patients with GSD VI and a literature review. <i>J Pediatr Endocrinol Metab</i> . 2020;33:1321–33.                                                     |
| 15. Luo X, Hu J, Gao X, Fan Y, Sun Y, Gu X, et al. Novel PYGL mutations in Chinese children leading to glycogen storage disease type VI: two case reports. <i>BMC Med Genet</i> . 2020;21:74.                                                                                             |
| 16. Ogawa A, Ogawa E, Yamamoto S, Fukuda T, Sugie H, Kohno Y. Case of glycogen storage disease type VI (phosphorylase deficiency) complicated by focal nodular hyperplasia. <i>Pediatr Int</i> . 2010;52:e150-153.                                                                        |
| 17. Roscher A, Patel J, Hewson S, Nagy L, Feigenbaum A, Kronick J, et al. The natural history of glycogen storage disease types VI and IX: Long-term outcome from the largest metabolic center in Canada. <i>Mol Genet Metab</i> . 2014;113:171–6.                                        |
| 18. Tang NLS, Hui J, Young E, Worthington V, To K-F, Cheung K-L, et al. A novel mutation (G233D) in the glycogen phosphorylase gene in a patient with hepatic glycogen storage disease and residual enzyme activity. <i>Mol Genet Metab</i> . 2003;79:142–5.                              |
| 19. Vega AI, Medrano C, Navarrete R, Desviat LR, Merinero B, Rodríguez-Pombo P, et al. Molecular diagnosis of glycogen storage disease and disorders with overlapping clinical symptoms by massive parallel sequencing. <i>Genet Med</i> . 2016;18:1037–43.                               |
| 20. Zhan Q, Lv Z, Tang Q, Huang L, Chen X, Yang M, et al. Glycogen storage disease type VI with a novel PYGL mutation: Two case reports and literature review. <i>Medicine (Baltimore)</i> . 2021;100:e25520.                                                                             |
